# Supplementary material for: Facile and Eco-Friendly Fabrication of Silver Nanoparticles Using Nyctanthes arbor-tristis Leaf Extract to Study Antibiofilm and Anticancer Properties against Candida albicans
Source: Hindawi journal article supplement (doi:10.1155/2022/2509089), 2022-01-07
Supplement: f1 [file 2509089.f1.docx]

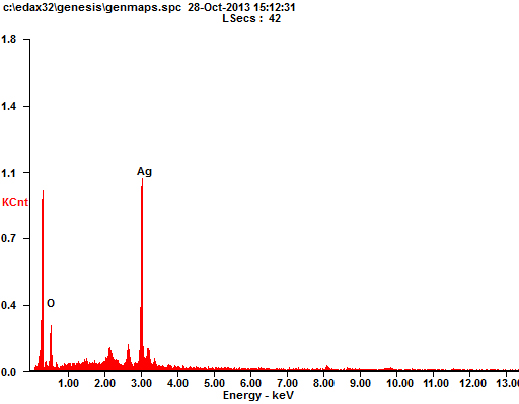


**Supplementary Figure S1: EDX analysis and a peak at 3KeV represents the silver ions as the main component, indicate the fabrication of *N. arbor-tristis*leaf extract intoAgNPs.**
